# Supplementary material for: Epithelial-mesenchymal transition classification of circulating tumor cells predicts clinical outcomes in progressive nasopharyngeal carcinoma
Source: PubMed Central journal article supplement (PMC9532596; doi:10.3389/fonc.2022.988458), 2022-09-21

# Study Design and Enrollment

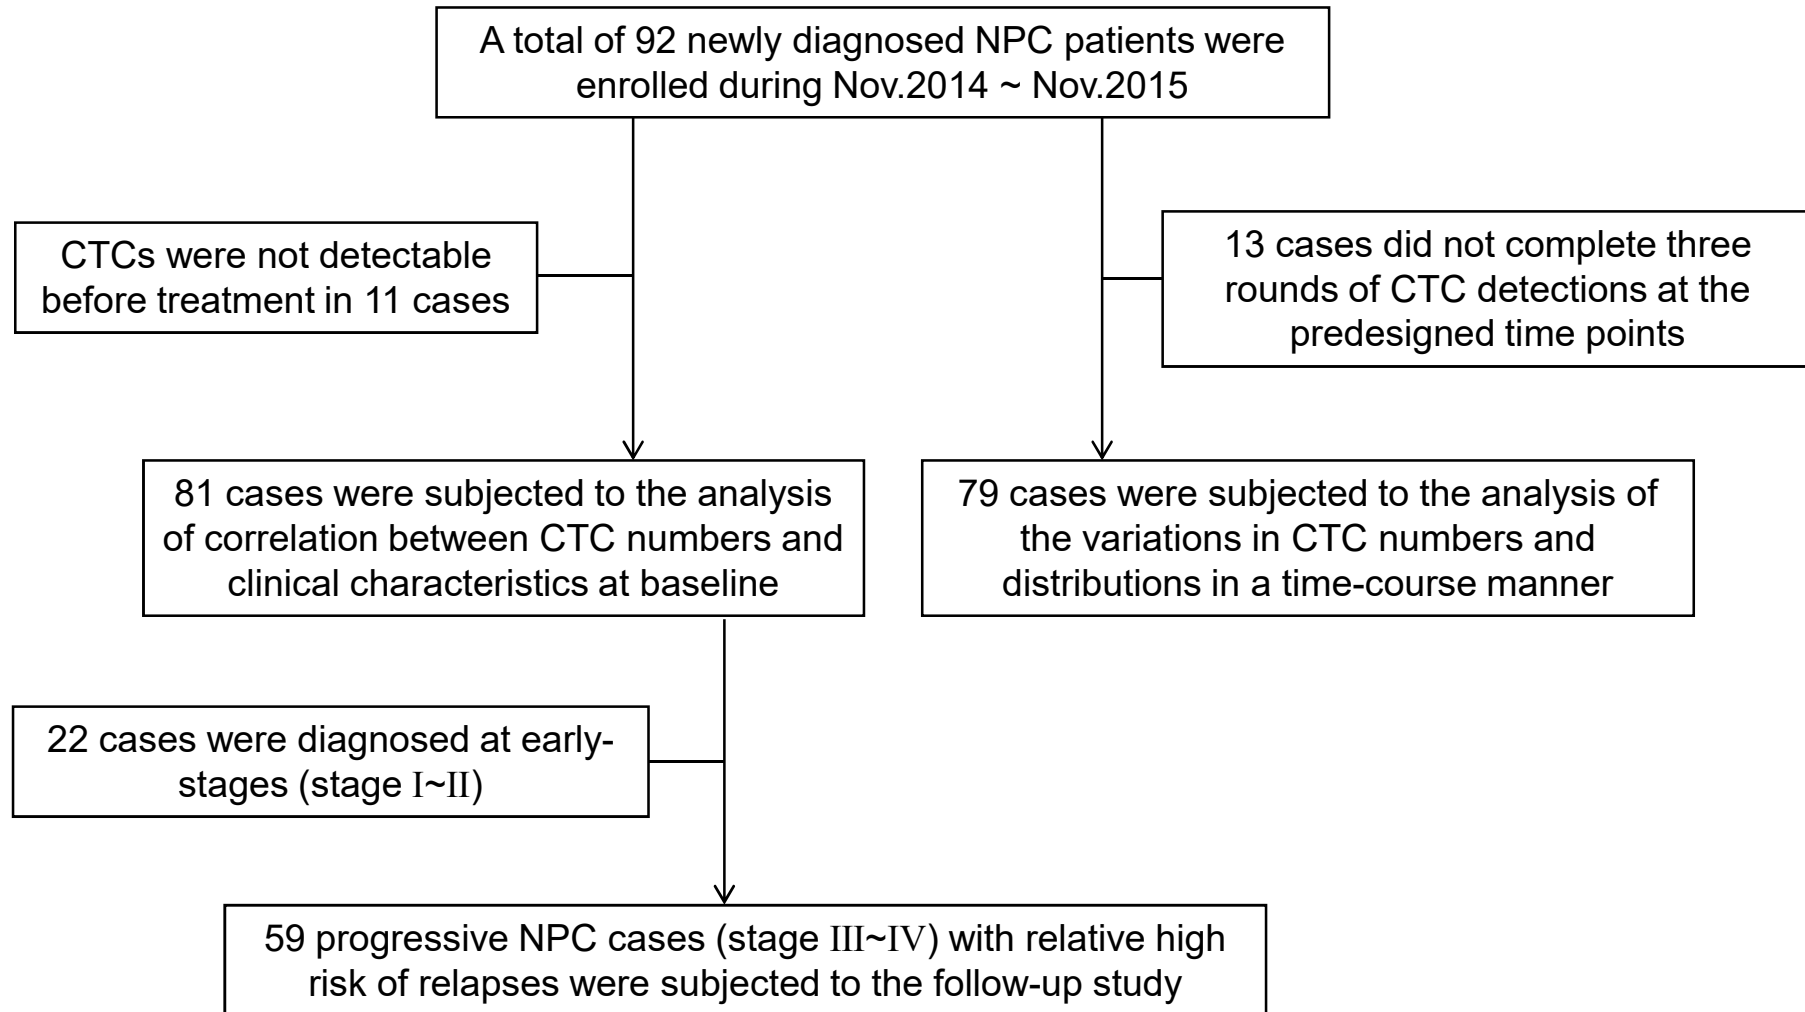

Supplement: DataSheet_1.pdf [file DataSheet_1.pdf]
